# Supplementary material for: Application of Chitosan Composite Flocculant in Tap Water Treatment
Source: Hindawi journal article supplement (doi:10.1155/2018/2768474), 2018-10-21
Supplement: f1 [file 2768474.f1.xlsx]

## Sheet: Experimental data
			I) Results of Treatment of water with single flocculants
Analysis of the Turbidity of the raw water of the tap water treated with only chitosan (Figure 2 )					Analysis of the Turbidity of the raw water of the tap water treated with only Polyaluminum Chloride(CF-PAC) (Figure 3)				Analysis of theTurbidity of the raw water of the tap water treated with only Modified Rectorite (Al (OH)3 + HCl) (Figure 4)
Quantity of Chitosan added to the raw water (drop)	Turbidity of the treated water (NTU)	Quantity of the sample water			Quantity of CF-PAC added to the sample water (ml)	Turbidity of the treated water (NTU)	Quantity of the sample water		Quantity of modified Rectorite added to the raw water (ml)	Turbidity of the treated water (NTU)	Quantity of the sample water
1	8.84	1 L			0.1	4.43	1 L		12.2	0.25	1 L
2	7.4				0.2	2.72			8.99	0.5
3	7.29				0.3	2.1			6.29	0.75
4	7.17				0.4	1.39			5.55	1
5	7.89				0.5	0.9			4.98	1.5
6	8.22				0.6	0.88			3.64	2
			II) Results of Water Treatment with Pair flocculants
Analysis of theTurbidity of the raw water of the tap water treated with Chitosan and Modified Rectorite (Al (OH)3 + HCl) (Figure 5 )					Analysis of the Turbidity of the raw water of the tap water treated with Chitosan and Polyaluminum Chloride (Figure 6 )					Analysis of the Turbidity of the raw water of the tap water treated with Polyaluminum Chloride and Modified Rectorite (Al (OH)3 + HCl) (Figure 7)
Quantity of Chitosan added to the raw water (drop)	Quantity of Modified Rectorite added to the raw water (ml)	Turbidity of the treated water (NTU)	Quantity of the sample water		Quantity of Chitosan added to the raw water (drop)	Quantity of Polyaluminum Chloride added to the raw water (ml)	Turbidity of the treated water (NTU)	Quantity of the sample water		Quantity of Modified Rectorite added to the raw water (ml)	Quantity of Polyaluminum Chloride added to the raw water (ml)	Turbidity of the treated water (NTU)	Quantity of the sample water
3	0.25	8.92	1 L		1	0.2	13.2	1 L		0.75	0.2	14.8	1 L
3	0.5	5.85			1	0.3	12.7			0.75	0.3	8.27
3	0.75	16.3			1	0.4	11.1			0.75	0.4	9.11
2	0.25	9.91			2	0.2	16.5
2	0.5	7.47			2	0.3	11.8
2	0.75	17.1			2	0.4	8.6
1	0.25	7.88			3	0.2	13.6
1	0.5	10.1			3	0.3	8.53
1	0.75	16.8			3	0.4	6.52
			III) Results of Water Treatment with combination of three flocculants
Analysis of theTurbidity of the raw water of the tap water treated by combining Chitosan(CTS), Polyaluminum Chloride(CF-PAC) and Modified Rectorite (Figure 8)						Analysis of theTurbidity of the raw water of the tap water treated by combining Chitosan (CTS), Polyaluminum Chloride(CF-PAC) and Modified Rectorite (Al (OH)3 + HCl) (Figure 9)
Quantity of Chitosan added to the raw water (Drop)	Quantity of Modified Rectorite added to the raw water (ml)	Quantity of Polyaluminum Chloride added to the raw water (ml)	Turbidity of the treated water (NTU)	Quantity of the sample water		Quantity of Chitosan added to the raw water (Drop)	Quantity of Modified Rectorite added to the raw water (ml)	Quantity of Polyaluminum Chloride added to the raw water (ml)	Turbidity of the treated water (NTU)	Quantity of the sample water
1	0.25	0.1	8.17	1 L		2	0.25	0.1	11	1 L
1	0.5	0.1	7.42			2	0.5	0.1	10.1
1	0.75	0.1	7.29			2	0.75	0.1	7.89
1	1	0.1	7.18			2	1	0.1	7.75
1	0.25	0.2	7.69			2	1.5	0.1	7.67
1	0.5	0.2	7.48			2	2	0.1	6.33
1	0.75	0.2	6.78			2	0.25	0.2	14.8
1	1	0.2	6.17			2	0.5	0.2	13.4
1	1.5	0.2	4.71			2	0.75	0.2	13.1
1	2	0.2	3.45			2	1	0.2	11.5
1	0.25	0.3	7.42			2	1.5	0.2	10.5
1	0.5	0.3	6.82			2	2	0.2	8.69
1	0.75	0.3	6.69			2	0.25	0.3	13.1
1	1	0.3	6.2			2	0.5	0.3	13.9
1	1.5	0.3	5.26			2	0.75	0.3	13.5
1	2	0.3	3.98			2	1	0.3	10.3
1	0.25	0.4	8.77			2	1.5	0.3	10.4
1	0.5	0.4	7.5			2	2	0.3	8.02
1	0.75	0.4	5.21			2	0.25	0.4	16.5
1	1	0.4	4.41
1	1.5	0.4	1.97
1	2	0.4	0.95
1	0.25	0.5	5.89
1	0.5	0.5	4.85
1	0.75	0.5	4.24
1	1	0.5	1.78
1	1.5	0.5	1.06
1	2	0.5	0.72
1	0.25	0.6	3.91
1	0.5	0.6	3.84
1	0.75	0.6	3.38
1	1	0.6	2.6
1	1.5	0.6	0.86
1	2	0.6	0.67
Table 1.The correlation of the most cost-effective formulations in each of the composite schemes
NO.	CTS（drop）：CF—PAC（ml）：Modified rectorite（ml）ratio	After conversion CTS（ml）：CF—PAC（ml）：Modified rectorite（ml）ratio	Turbidity removal rate（%）	Cost effective value
1	1：0：0.5	1：0：10	83.25	6642.6
2	1：0.3：0	1：30：0	92.35	5307.49
3	1：0.2：0	1：20：0	93.33	6964.93
4	0：0.2：0.25	0：20：5	93.3	8066.5
5	1：0.1：0.25	1：10：5	75.09	5790.87
6	1：0.2：0.25	1：20：5	96.25	5673.04
7	1：0.3：0.25	1：30：5	96.38	4596.97
8	2：0.1：0.5	2：10：10	95.71	4363.83
